# Supplementary material for: Global assessment of climatic responses to the ozone-vegetation interactions
Source: Copernicus journal article supplement (doi:10.5194/egusphere-2024-365), 2024-04-17
Supplement: Supplementary file 1 [file egusphere-2024-365-supplement.pdf]

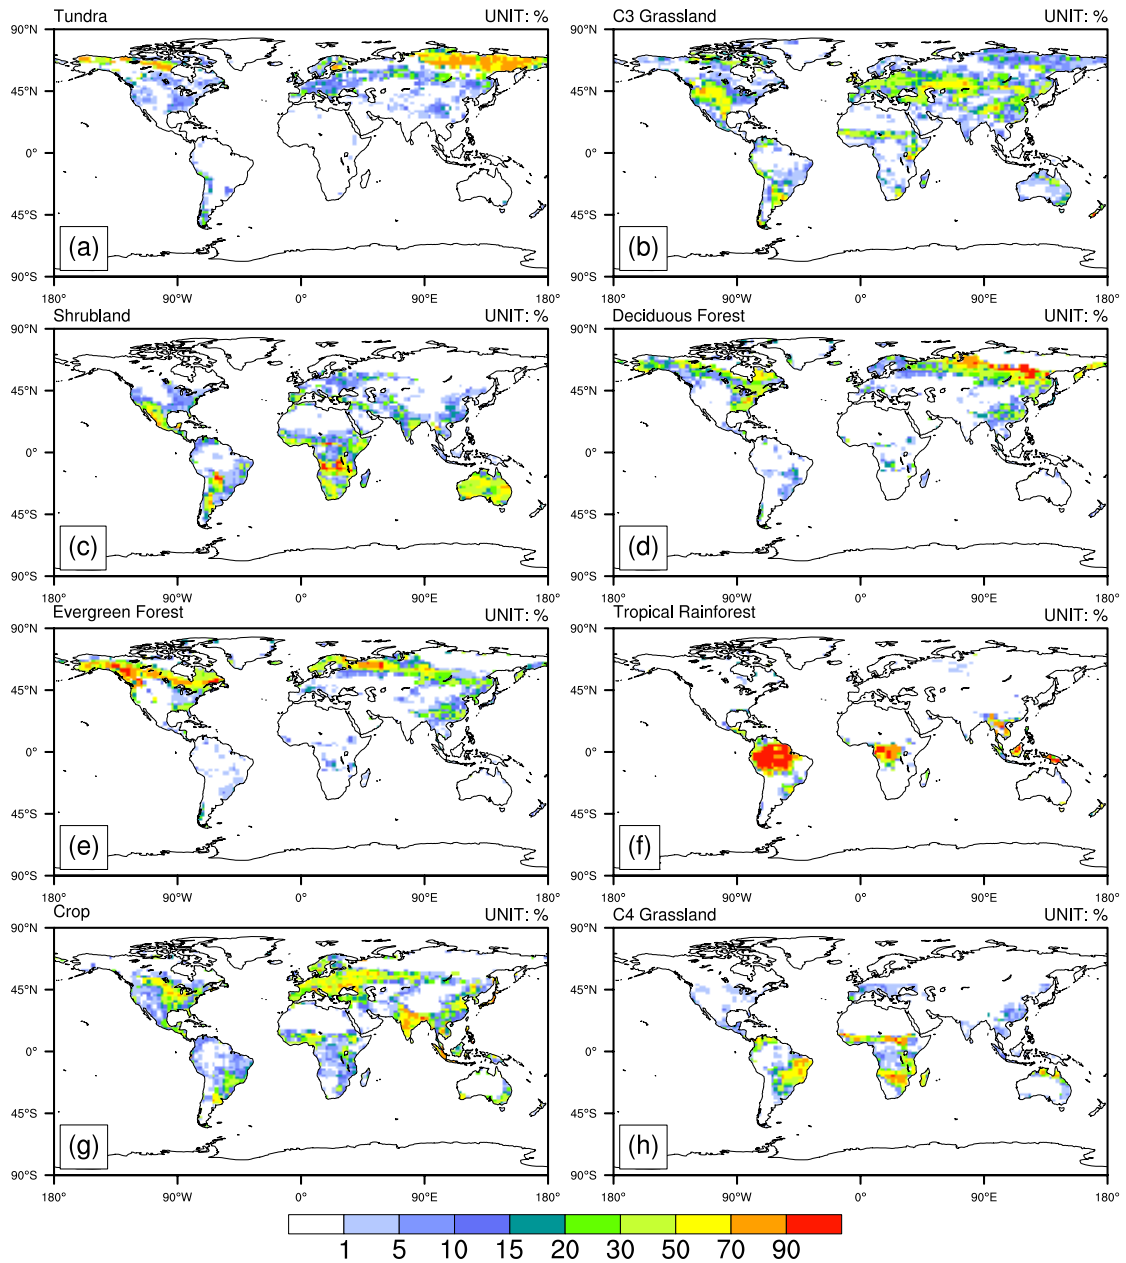

1

2 **Fig. S1.** The cover fraction of 8 plant functional types (PFTs) from the LUH2 used in  
 3 the ModelE2-YIBs model.

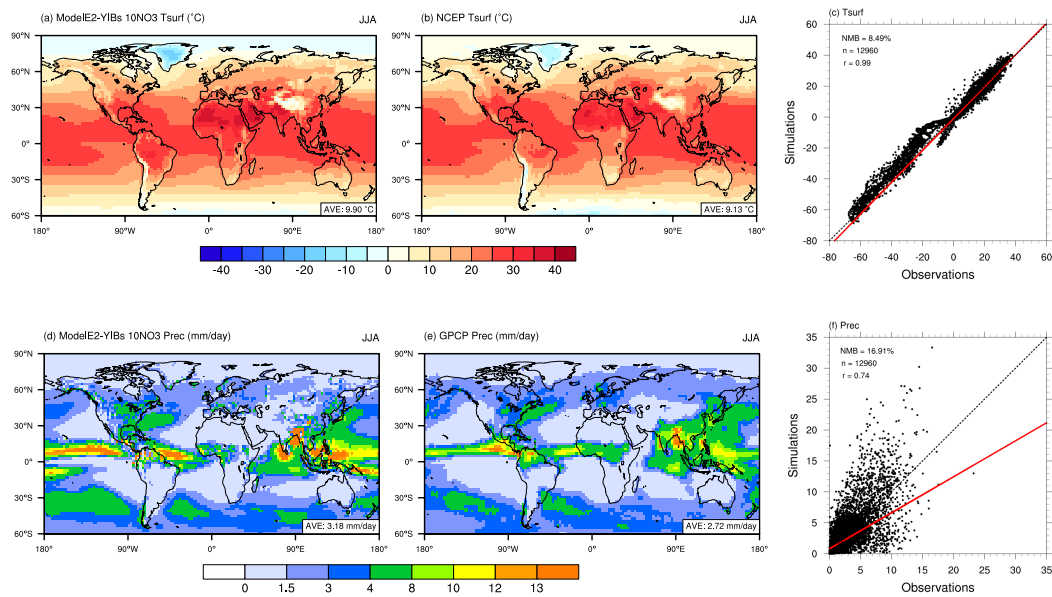

4

5 **Fig. S2.** Evaluation of the summertime (June-August) meteorological field in 2010s  
 6 simulated by the ModelE2-YIBs model. Surface temperature (top) and precipitation  
 7 (bottom) from the simulation 10NO3 (left) and reanalysis data (middle) are compared.  
 8 The correlation coefficients ( $r$ ), normalized mean bias (NMB), and number of grid cells  
 9 ( $n$ ) for the comparisons are calculated between the simulations and observations are  
 10 listed on the scatter panels.

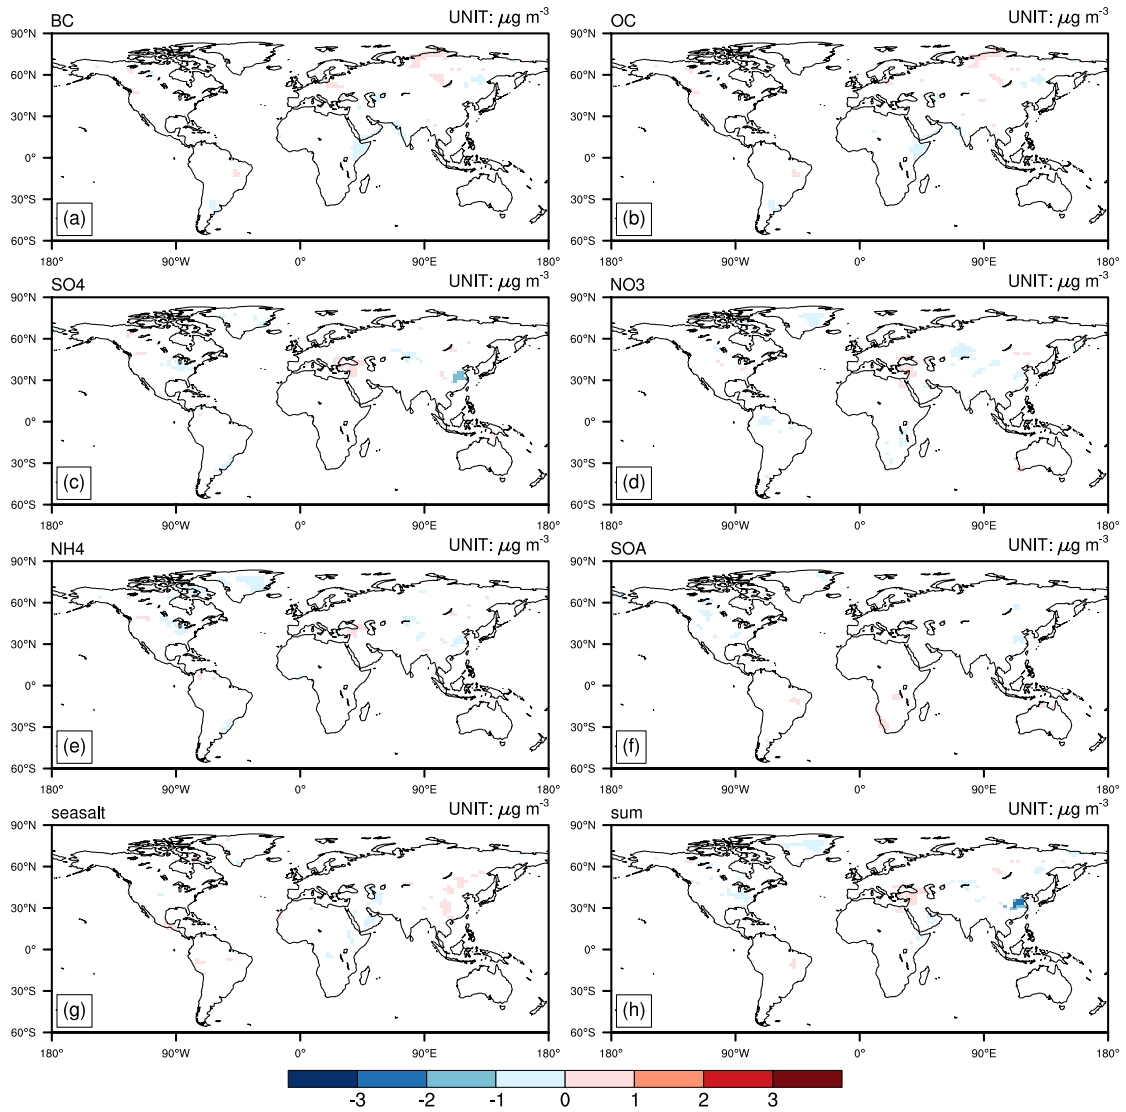

11

12 **Fig. S3.** Changes in 7 types (a-g) summer PM<sub>2.5</sub> (without silts) and their sum (h) in  
 13 2010s in the model by ozone-vegetation interactions. Results shown are the differences  
 14 of PM<sub>2.5</sub> between 10HO3 and 10NO3. Only the significant changes ( $p < 0.05$ ) are  
 15 presented.

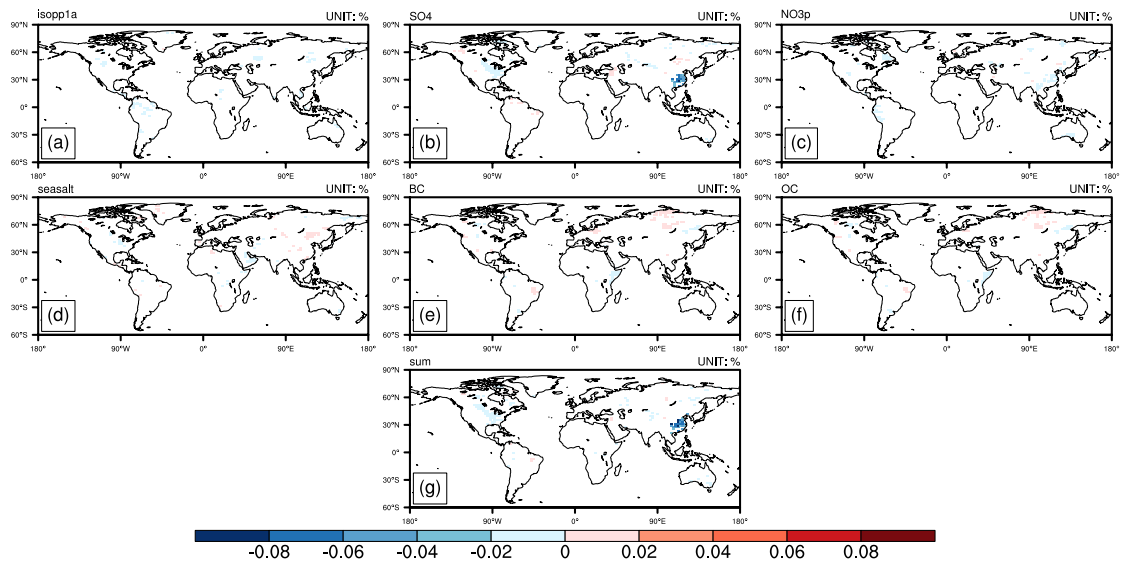

16

17 **Fig. S4.** Changes in 6 types (a-f) summer aerosol optical depth (AOD) and their sum  
 18 (g) in 2010s in the model by O<sub>3</sub>-vegetation interactions. Results shown are the  
 19 differences of AOD between 10HO<sub>3</sub> and 10NO<sub>3</sub>. Only the significant changes ( $p <$   
 20 0.05) are presented.

21

**Table S1.** Parameters for O<sub>3</sub> damage scheme

| PFT <sup>a</sup>                                          | TDA            | CRAC3          | CRAC4          | SHR            | DBF            | ENF            | TRF            | CRO            |                |
|-----------------------------------------------------------|----------------|----------------|----------------|----------------|----------------|----------------|----------------|----------------|----------------|
| Carboxylation                                             | C <sub>3</sub> | C <sub>3</sub> | C <sub>4</sub> | C <sub>3</sub> | C <sub>4</sub> |
| $F_{O_3,crit}$<br>(mmol m <sup>-2</sup> s <sup>-1</sup> ) | 1.6            | 5              | 5              | 1.6            | 1.6            | 1.6            | 1.6            | 5              | 5              |
| $a_h$ <sup>b</sup><br>(mmol m <sup>-2</sup> )             | 0.1            | 1.4            | 0.735          | 0.1            | 0.15           | 0.075          | 0.15           | 1.4            | 0.735          |

23 <sup>a</sup> Plant function types (PFTs) are tundra (TDA), C<sub>3</sub> grassland (GRAC3), C<sub>4</sub>  
 24 savanna/grassland (GRAC4), shrubland (SHR), deciduous broadleaf forest (DBF),  
 25 evergreen needleleaf forest (ENF), tropical rainforest (TRF), and cropland (CRO).

26 <sup>b</sup> Parameters  $a_h$  is the high O<sub>3</sub>-damaging sensitivities.

27 **Table S2.** Relative changes of terrestrial ecosystems in two major geographic regions  
28 in response to O<sub>3</sub>-vegetation interactions in model

| Region        | GPP     | Stomatal Conductance | LAI    |
|---------------|---------|----------------------|--------|
| eastern China | -18.43% | -30.62%              | -4.53% |
| eastern U.S.  | -16.12% | -25.65%              | -5.87% |

29

30 **Table S3.** Changes of climatic variables in two major geographic regions in response  
 31 to O<sub>3</sub>-vegetation interactions in model

| Region        | Surface Air Temperature<br>(unit: °C) | Precipitation<br>(unit: mm day <sup>-1</sup> ) | Sensible Heat Flux<br>(W m <sup>-2</sup> ) |
|---------------|---------------------------------------|------------------------------------------------|--------------------------------------------|
| eastern China | 0.56                                  | -0.79 (-16.18%)                                | 7.12 (25.46%)                              |
| eastern U.S.  | 0.33                                  | -0.45 (-9.82%)                                 | 6.3 (16.54%)                               |

32

33 **Table S4.** Changes of air pollution in two major geographic regions in response to O<sub>3</sub>-  
34 vegetation interactions in model

| Region        | O <sub>3</sub> (ppbv) | PM <sub>2.5</sub> (unit: $\mu\text{g m}^{-3}$ ) | AOD             |
|---------------|-----------------------|-------------------------------------------------|-----------------|
| eastern China | 1.26                  | -1.94 (-8.52%)                                  | -0.06 (-14.67%) |
| eastern U.S.  | 0.98                  | -0.27 (-6.01%)                                  | -0.01 (-8.25%)  |

35
